# Supplementary material for: A Study on the Microstructure Regulation Effect of Niobium Doping on LiNi0.88Co0.05Mn0.07O2 and the Electrochemical Performance of the Composite Material under High Voltage
Source: MDPI journal article supplement (doi:10.3390/ma17092127), 2024-04-30
Supplement: s1 [file s1]

## Supporting information

### The Electrochemical Performance And Microstructure of $\text{LiNi}_{0.88}\text{Co}_{0.05}\text{Mn}_{0.07}\text{O}_2$ Cathode Material Working In High-voltage By Niobium Doping

Xinrui Xu, Junjie Liu, Bo Wang, Jiaqi Wang, Weisong Meng, Feipeng Cai\*

Energy Institute, Qilu University of Technology (Shandong Academy of Sciences),  
Jinan, 250014, China

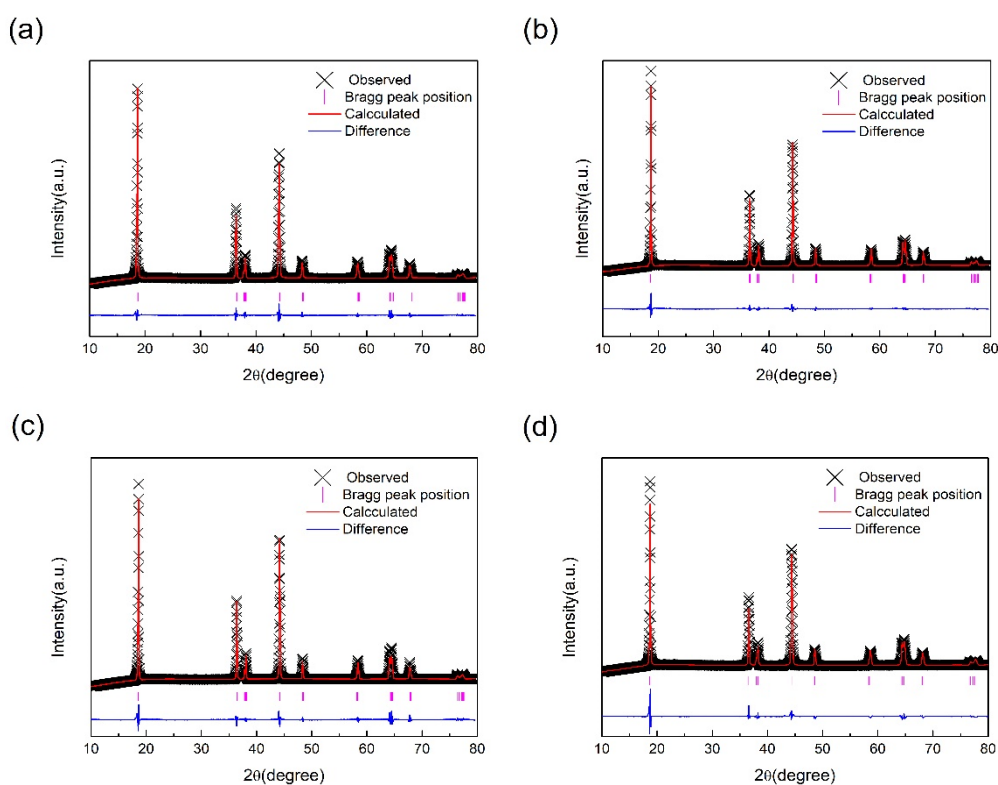

**Figure S1.** XRD Rietveld refinement patterns of (a) NCM88-0 (b), NCM88-0.3Nb (c) NCM88-0.5 Nb (d) NCM88-1Nb
